# Supplementary material for: Electrochemical preparation of a three dimensional PEDOT–CuxO hybrid for enhanced oxidation and sensitive detection of hydrazine
Source: Royal Society of Chemistry journal article supplement (doi:10.1039/c5ay02465j), 2015-11-13
Supplement: c5ay02465j1.pdf [file c5ay02465j1.pdf]

## Supporting Information

Electrochemical preparation of three dimensional PEDOT-Cu<sub>x</sub>O hybrid  
for enhanced oxidation and sensitive detection of hydrazine

Fugang Xu<sup>\*1,2</sup>, Ying Liu<sup>1,2</sup>, Shi Xie<sup>1,2</sup>, Li Wang<sup>\*1,2</sup>

<sup>1</sup>Key Laboratory of Functional Small Organic Molecule, Ministry of Education and Jiangxi's Key Laboratory of Green Chemistry, Jiangxi Normal University, Nanchang 330022, China

<sup>2</sup>College of Chemistry and Chemical Engineering, Jiangxi Normal University, Nanchang 330022, People's Republic of China

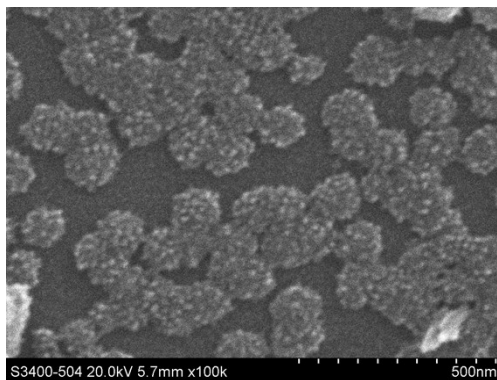

Fig. S1. SEM images of Cu<sub>x</sub>O directed deposited on bare GCE.

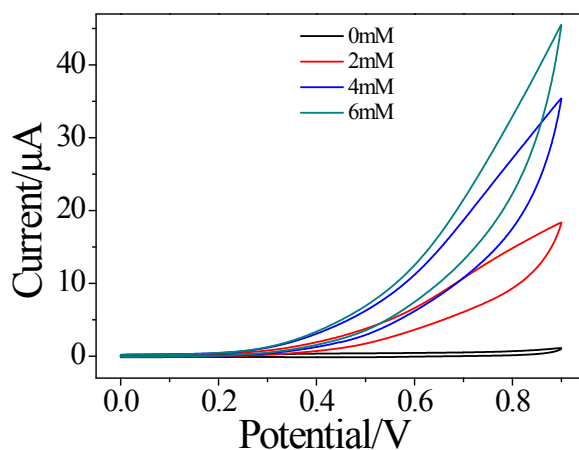

Fig. S2 The cyclic voltammety of bare GCE in the absence or in the presence of different concentration of hydrazine.

---

\* Corresponding authors: Tel: +86-791-88120861, Fax: +86-791-88120861  
E-mail: [fgxu@jxnu.edu.cn](mailto:fgxu@jxnu.edu.cn) (F.G. Xu), and [lwang@jxnu.edu.cn](mailto:lwang@jxnu.edu.cn) (L. Wang).

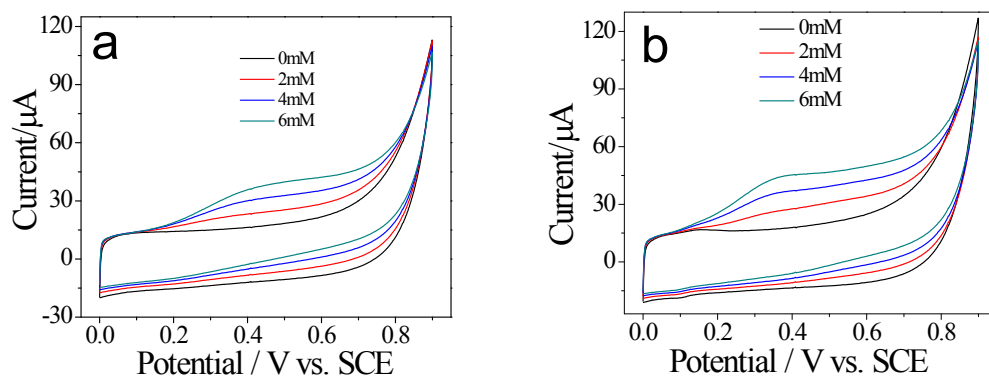

Fig. S3 Cyclic voltammetry of different concentration of hydrazine on planar 2D-PEDOT/GCE (a) or 2D-PEDOT-Cu<sub>x</sub>O/GCE (b).

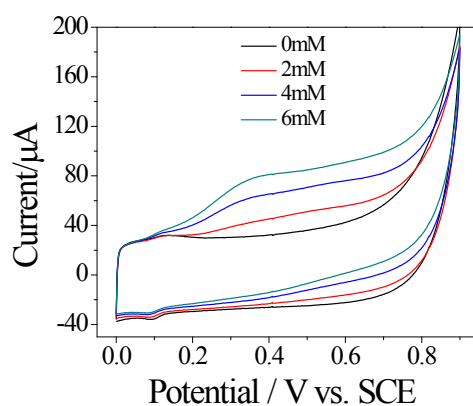

Fig. S4 Cyclic voltammetry of different concentration of hydrazine on 3D-PEDOT/GCE with similar Cu<sub>x</sub>O loading amount with that on Cu<sub>x</sub>O/GCE shown in Fig. 3a. The Cu<sub>x</sub>O loading amount was tuned by changing the electrodeposition time of Cu on modified electrode. The loading amount of Cu<sub>x</sub>O on Cu<sub>x</sub>O/GCE with deposition time 90s (Fig. 3a) is similar to that on 3D-PEDOT-Cu<sub>x</sub>O/GCE with deposition time 45s.

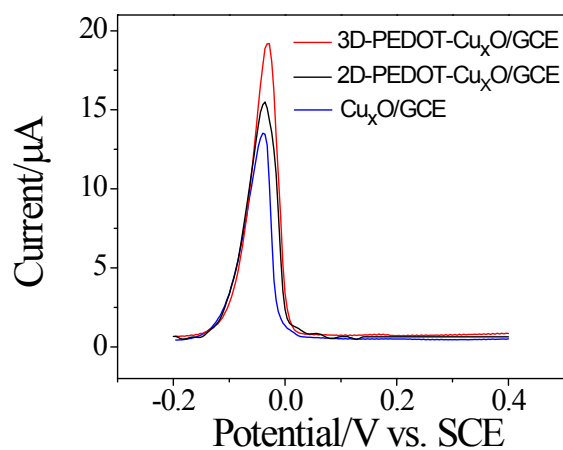

Fig. S5 The stripping voltammetry for Cu comes from PEDOT- $\text{Cu}_x\text{O}/\text{GCE}$ (red curve) or  $\text{Cu}_x\text{O}/\text{GCE}$  (blue curve).

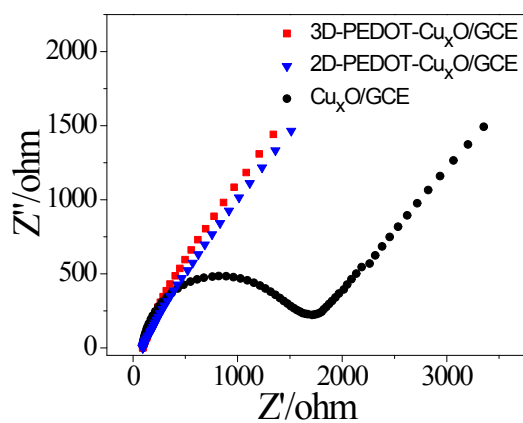

Fig. S6 EIS measurement results of PEDOT- $\text{Cu}_x\text{O}/\text{GCE}$  (red curve) or  $\text{Cu}_x\text{O}/\text{GCE}$  (black curve) in 5 mM  $\text{K}_3\text{Fe}(\text{CN})_6$  - $\text{K}_4\text{Fe}(\text{CN})_6$  in the presence of 0.1M KCl.

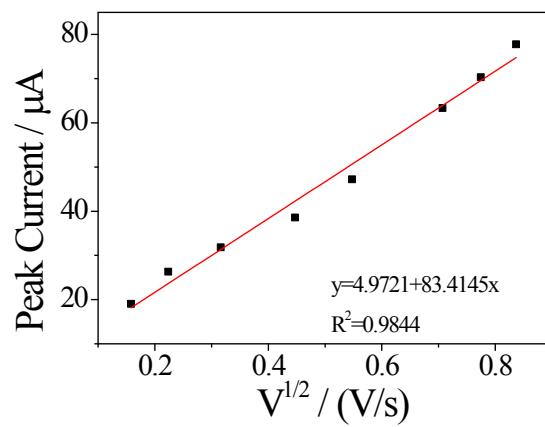

Fig. S7 The current response of hydrazine oxidation versus scan rate obtained from PEDOT- $\text{Cu}_x\text{O}/\text{GCE}$  in pH 8.0 PBS in the presence of 4 mM hydrazine. (Derived from Fig. 4a in manuscript, and the background current were subtracted.)
